# Supplementary material for: Thromboelastography (TEG) in patients with adenomyosis
Source: Research Square preprint supplement (doi:10.21203/rs.3.rs-6220839/v1), 2025-03-27
Supplement: Supplementary file 1 [file d0c28bf2ac1889259dd75589.docx]

**Table S1 Spearman correlation of APTT, R, and MA withCA125, HGB, uterine volume, VAS, and MVJ in patients with Adenomyosis.**

| Parameters | CA125 (U/ml) | | HGB (g/L) | | VAS | | MVJ | | Uterine volume (cm^3) | |
| --- | --- | --- | --- | --- | --- | --- | --- | --- | --- | --- |
|  | r | *p* | r | *p* | r | *p* | r | *p* | r | *p* |
| APTT (s) | -0.020 | 0.811 | 0.041 | 0.618 | -0.115 | 0.161 | -0.048 | 0.559 | 0.013 | 0.874 |
| R | -0.001 | 0.988 | 0.272 | 0.001 | -0.149 | 0.068 | -0.084 | 0.307 | -0.126 | 0.125 |
| MA | 0.222 | 0.008 | -0.146 | 0.073 | 0.161 | 0.048 | 0.058 | 0.480 | 0.049 | 0.549 |

Abbreviations: APTT, activated partial thromboplastin time; HGB, hemoglobin; MA: maximum amplitude (MA); MVJ, Mansfield–Voda–Jorgensen; R: reaction time; VAS, visual analogue scale.
